# Supplementary material for: Comprehensive Genomic Analysis of SnRK in Rosaceae and Expression Analysis of RoSnRK2 in Response to Abiotic Stress in Rubus occidentalis
Source: MDPI journal article supplement (doi:10.3390/plants12091784), 2023-04-26
Supplement: s1 [file s1]

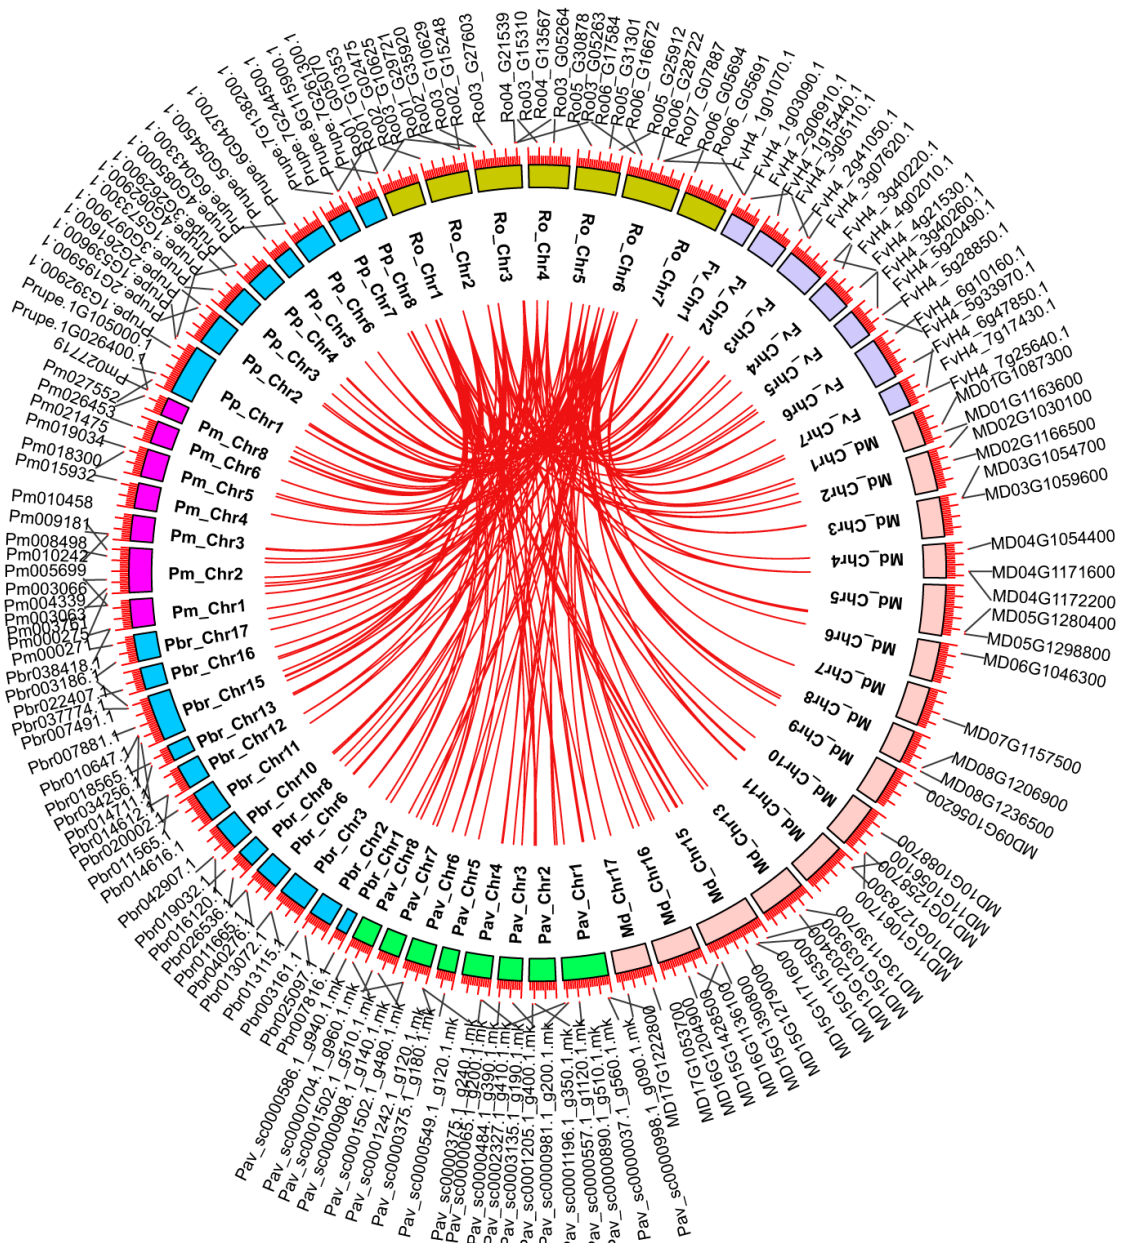

**Figure S1.** The collinear correlation of the *SnRK* is displayed between black raspberry and six other Rosaceae species.

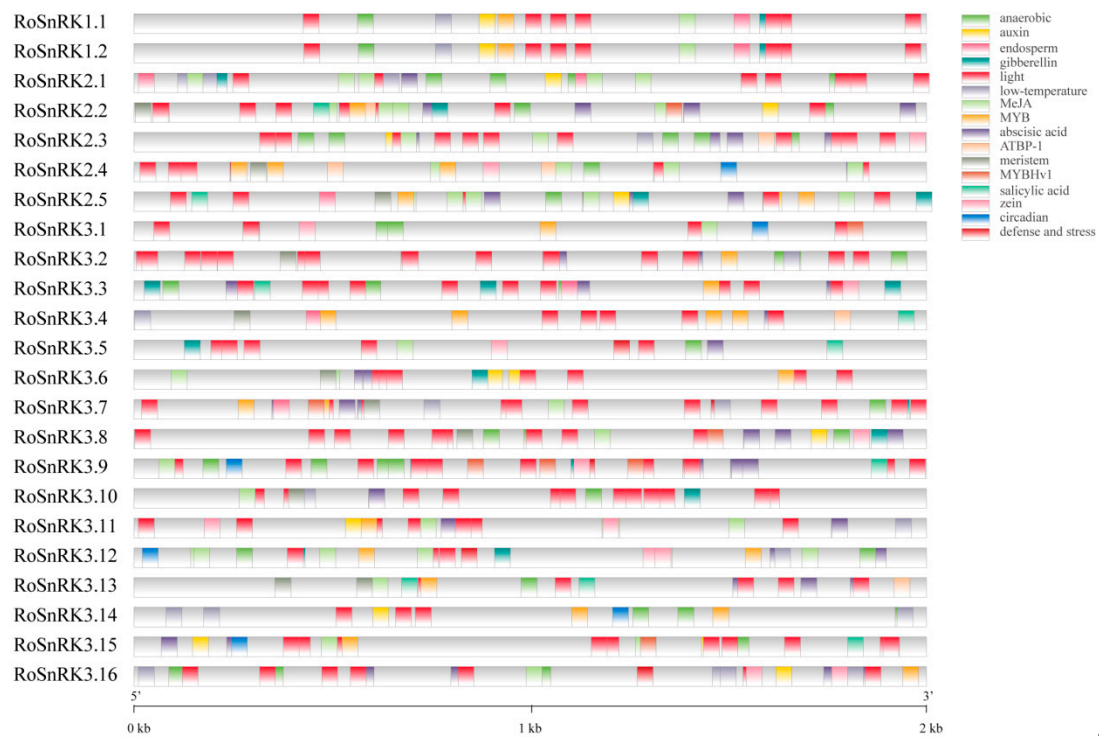

**Figure S2.** Predicted cis-regulatory elements in *RoSnRK* promoters. Promoter sequences (2000 bp) of 23 *RoSnRK* genes were analyzed by PlantCARE. Boxes with different colours were represented different types of element.
