# Supplementary material for: Comprehensive Genomic Analysis of SnRK in Rosaceae and Expression Analysis of RoSnRK2 in Response to Abiotic Stress in Rubus occidentalis
Source: Plants (Basel). 2023 Apr 26;12(9):1784. doi: 10.3390/plants12091784 (PMC10181103; doi:10.3390/plants12091784)
Supplement: Supplementary file 1 [file plants-12-01784-s001.zip › Supplementary Tables.xlsx]

## Sheet: S_Table1
Gene features of all identified SnRK genes in eight Rosaceaes
Species name	Subfamily	Gene ID/Name	Chromosome	Start (bp)	End (bp)	Protein Molecular Weight	Protein Isoelectric Point
Rubus occidentalis	RoSnRK1	Ro06_G17584/RoSnRK1.1	Ro06	2592670	2597990	58.25 kDa	pH 8.78
		Ro06_G28722/RoSnRK1.2	Ro06	24014737	24020055	57.93 kDa	pH 9.59
	RoSnRK2	Ro05_G31301/RoSnRK2.1	Ro05	27653544	27657972	40.45 kDa	pH 6.36
		Ro01_G29721/RoSnRK2.2	Ro01	7234305	7239211	35.09 kDa	pH 4.47
		Ro02_G35920/RoSnRK2.3	Ro02	36191621	36194976	36.67 kDa	pH 4.54
		Ro02_G15248/RoSnRK2.4	Ro02	36214892	36220407	32.28 kDa	pH 4.43
		Ro05_G30878/RoSnRK2.5	Ro05	11014532	11018544	27.25 kDa	pH 8.30
	RoSnRK3	Ro06_G05691/RoSnRK3.1	Ro06	29405354	29407128	56.91 kDa	pH 9.10
		Ro03_G10629/RoSnRK3.2	Ro03	3458850	3461485	60.57 kDa	pH 9.68
		Ro01_G05070/RoSnRK3.3	Ro01	570937	572407	52.50 kDa	pH 10.06
		Ro03_G05263/RoSnRK3.4	Ro03	40177398	40179579	57.26 kDa	pH 9.38
		Ro06_G16672/RoSnRK3.5	Ro06	9108648	9110465	51.57 kDa	pH 9.03
		Ro02_G02475/RoSnRK3.6	Ro02	221146	222444	48.75 kDa	pH 8.83
		Ro03_G05264/RoSnRK3.7	Ro03	40173355	40175824	55.27 kDa	pH 8.03
		Ro06_G05694/RoSnRK3.8	Ro06	29384013	29385335	49.81 kDa	pH 7.85
		Ro03_G10625/RoSnRK3.9	Ro03	3425003	3426340	50.42 kDa	pH 7.82
		Ro04_G13567/RoSnRK3.10	Ro04	23018027	23019319	47.17 kDa	pH 8.43
		Ro01_G10353/RoSnRK3.11	Ro01	1477793	1483495	48.20 kDa	pH 8.88
		Ro05_G25912/RoSnRK3.12	Ro05	36553282	36558790	51.52 kDa	pH 7.17
		Ro04_G21539/RoSnRK3.13	Ro04	7872371	7877197	37.42 kDa	pH 7.56
		Ro03_G27603/RoSnRK3.14	Ro03	18217002	18222622	41.80 kDa	pH 5.23
		Ro03_G15310/RoSnRK3.15	Ro03	38715770	38722331	52.84 kDa	pH 9.03
		Ro07_G07887/RoSnRK3.16	Ro07	983520	988793	48.29 kDa	pH 8.53
Fragaria vesca	FvSnRK1	FvH4_6g47850.1	Fvb6	36181839	36186817	59.19 kDa	pH 8.65
	FvSnRK2	FvH4_1g15440.1	Fvb1	8751658	8756413	44.95 kDa	pH 4.54
		FvH4_1g20310.1	Fvb1	12539891	12542939	38.39 kDa	pH 4.98
		FvH4_2g06910.1	Fvb2	5703999	5710029	41.23 kDa	pH 4.64
		FvH4_4g13050.1	Fvb4	16683493	16684587	41.49 kDa	pH 9.28
		FvH4_5g20490.1	Fvb5	12133329	12137158	38.05 kDa	pH 6.13
		FvH4_5g28850.1	Fvb5	19967777	19971895	37.33 kDa	pH 6.13
		FvH4_5g36730.1	Fvb5	26930499	26949898	100.99 kDa	pH 7.11
		FvH4_5g36740.1	Fvb5	26952396	26955572	30.13 kDa	pH 8.22
	FvSnRK3	FvH4_1g01070.1	Fvb1	549852	551135	47.97 kDa	pH 9.87
		FvH4_1g03090.1	Fvb1	1745934	1750527	50.78 kDa	pH 9.13
		FvH4_2g41050.1	Fvb2	29122749	29124098	50.49 kDa	pH 9.20
		FvH4_3g05110.1	Fvb3	2958452	2964366	52.17 kDa	pH 9.48
		FvH4_3g07620.1	Fvb3	4488053	4489576	56.29 kDa	pH 7.87
		FvH4_3g07630.1	Fvb3	4492826	4494220	52.30 kDa	pH 9.57
		FvH4_3g27610.1	Fvb3	20681264	20687870	53.98 kDa	pH 6.37
		FvH4_3g40220.1	Fvb3	33993641	33996125	53.66 kDa	pH 8.95
		FvH4_3g40260.1	Fvb3	34016904	34018223	49.49 kDa	pH 8.51
		FvH4_4g02010.1	Fvb4	1798580	1799896	47.51 kDa	pH 9.05
		FvH4_4g08900.1	Fvb4	9796010	9799571	52.40 kDa	pH 5.78
		FvH4_4g21530.1	Fvb4	24576399	24581047	51.96 kDa	pH 7.91
		FvH4_5g33970.1	Fvb5	24641189	24650128	49.31 kDa	pH 7.09
		FvH4_6g10160.1	Fvb6	6029925	6031244	49.59 kDa	pH 7.83
		FvH4_6g10210.1	Fvb6	6064268	6067075	53.29 kDa	pH 9.43
		FvH4_7g17430.1	Fvb7	14814308	14818804	48.99 kDa	pH 9.18
		FvH4_7g25640.1	Fvb7	19572743	19579892	133.73 kDa	pH 8.37
Malus domestica	MdSnRK1	MD09G1056200	Chr09	3719820	3723909	59.91 kDa	pH 8.70
		MD17G1053700	Chr17	4171189	4175804	60.37 kDa	pH 8.93
	MdSnRK2	MD00G1050800	Chr00	9602632	9605741	25.73 kDa	pH 7.94
		MD01G1035000	Chr01	11830598	11833546	38.47 kDa	pH 5.83
		MD02G1166500	Chr02	14266244	14270729	40.54 kDa	pH 4.45
		MD04G1054400	Chr04	6509068	6512717	38.37 kDa	pH 6.36
		MD06G1046300	Chr06	6293617	6297175	38.41 kDa	pH 6.41
		MD08G1187200	Chr08	23559255	23562042	38.57 kDa	pH 6.85
		MD08G1236500	Chr08	30418868	30422789	40.34 kDa	pH 6.58
		MD10G1088700	Chr10	13141229	13145498	43.40 kDa	pH 8.30
		MD10G1089100	Chr10	13174757	13179001	42.62 kDa	pH 4.65
		MD15G1279000	Chr15	24695317	24700361	40.78 kDa	pH 4.50
		MD15G1321000	Chr15	33476223	33479125	38.44 kDa	pH 5.47
		MD15G1373000	Chr15	45551914	45554922	38.53 kDa	pH 6.37
		MD15G1373200	Chr15	45557059	45560468	36.39 kDa	pH 9.07
		MD15G1428500	Chr15	52919102	52923095	40.38 kDa	pH 6.36
	MdSnRK3	MD01G1087300	Chr01	19657705	19663688	54.20 kDa	pH 7.98
		MD01G1163600	Chr01	26845577	26847711	50.74 kDa	pH 9.93
		MD02G1030100	Chr02	2328626	2333299	50.72 kDa	pH 8.99
		MD03G1054700	Chr03	4364593	4365969	51.17 kDa	pH 8.75
		MD03G1163600	Chr03	20387379	20392899	50.03 kDa	pH 7.34
		MD04G1171600	Chr04	26320357	26323132	52.29 kDa	pH 7.91
		MD04G1172200	Chr04	26364436	26365743	49.15 kDa	pH 7.99
		MD05G1280400	Chr05	41438754	41441672	41.84 kDa	pH 9.67
		MD05G1298800	Chr05	43227443	43229267	55.57 kDa	pH 8.14
		MD05G1298900	Chr05	43234137	43235528	52.02 kDa	pH 9.07
		MD07G1157500	Chr07	22903603	22908557	50.52 kDa	pH 8.52
		MD08G1206900	Chr08	26867422	26873713	52.34 kDa	pH 7.00
		MD10G1258700	Chr10	35272525	35277492	51.99 kDa	pH 9.26
		MD10G1278300	Chr10	36891712	36894607	55.36 kDa	pH 7.72
		MD10G1278400	Chr10	36900530	36901906	51.14 kDa	pH 8.93
		MD11G1056100	Chr11	4775635	4777011	51.29 kDa	pH 8.57
		MD11G1061700	Chr11	5378188	5380687	53.42 kDa	pH 9.02
		MD12G1185000	Chr12	26597295	26600175	54.64 kDa	pH 8.97
		MD12G1185400	Chr12	26664330	26665845	49.00 kDa	pH 7.29
		MD13G1139700	Chr13	10758065	10764714	50.93 kDa	pH 8.53
		MD13G1203400	Chr13	18318421	18319719	47.07 kDa	pH 9.60
		MD13G1265500	Chr13	34273817	34277117	52.90 kDa	pH 7.29
		MD15G1039300	Chr15	2754046	2756109	50.33 kDa	pH 8.68
		MD15G1153500	Chr15	11383159	11384457	48.60 kDa	pH 9.53
		MD15G1171600	Chr15	13326363	13330874	49.31 kDa	pH 8.32
		MD15G1390800	Chr15	48511598	48516801	51.11 kDa	pH 7.40
		MD16G1136100	Chr16	10427111	10432645	49.94 kDa	pH 6.45
		MD16G1204900	Chr16	18892211	18893512	47.54 kDa	pH 9.34
		MD17G1222800	Chr17	27163428	27164807	52.04 kDa	pH 9.53
		MD03G1059600	Chr03	4813144	4815758	52.58 kDa	pH 8.98
Prunus avium	PavSnRK1	Pav_sc0000484.1_g390.1.mk	PAV_r1.0chr3	19218122	19222504	58.79 kDa	pH 8.44
	PavSnRK2	Pav_sc0000257.1_g130.1.mk	PAV_r1.0chr4	38330162	38332998	25.49 kDa	pH 6.52
		Pav_sc0000257.1_g140.1.mk	PAV_r1.0chr4	38325712	38329389	49.21 kDa	pH 5.54
		Pav_sc0000549.1_g120.1.mk	PAV_r1.0chr5	5571478	5575380	29.21 kDa	pH 5.51
		Pav_sc0000639.1_g120.1.mk	PAV_r1.0chr6	13847033	13849227	31.58 kDa	pH 5.58
		Pav_sc0000908.1_g140.1.mk	PAV_r1.0chr8	10464292	10469481	32.11 kDa	pH 4.47
		Pav_sc0001196.1_g350.1.mk	PAV_r1.0chr1	39665605	39670186	36.64 kDa	pH 7.06
		Pav_sc0001242.1_g120.1.mk	PAV_r1.0chr7	12293817	12298875	33.34 kDa	pH 4.56
	PavSnRK3	Pav_sc0000499.1_g180.1.mk	PAV_r1.0chr6	12586259	12591794	41.01 kDa	pH 5.35
		Pav_sc0000037.1_g580.1.mk	PAV_r1.0chr4	3689012	3690472	54.52 kDa	pH 7.52
		Pav_sc0000037.1_g560.1.mk	PAV_r1.0chr1	3683976	3685370	52.10 kDa	pH 8.86
		Pav_sc0000065.1_g200.1.mk	PAV_r1.0chr4	6512009	6516517	39.64 kDa	pH 5.72
		Pav_sc0000308.1_g280.1.mk	PAV_r1.0chr1	5280175	5283097	44.39 kDa	pH 6.72
		Pav_sc0000375.1_g180.1.mk	PAV_r1.0chr6	1798411	1799790	51.60 kDa	pH 9.13
		Pav_sc0000375.1_g240.1.mk	PAV_r1.0chr6	1780351	1782092	46.28 kDa	pH 9.75
		Pav_sc0000557.1_g1120.1.mk	PAV_r1.0chr2	19230411	19231709	48.60 kDa	pH 9.51
		Pav_sc0000586.1_g940.1.mk	PAV_r1.0chr8	17296460	17300629	42.23 kDa	pH 8.65
		Pav_sc0000704.1_g960.1.mk	PAV_r1.0chr7	18337733	18342637	47.37 kDa	pH 9.00
		Pav_sc0000890.1_g510.1.mk	PAV_r1.0chr1	29638266	29639600	50.19 kDa	pH 8.61
		Pav_sc0000981.1_g200.1.mk	PAV_r1.0chr3	7229763	7230848	41.03 kDa	pH 7.71
		Pav_sc0000998.1_g090.1.mk	PAV_r1.0chr1	1889407	1890714	47.96 kDa	pH 8.65
		Pav_sc0001205.1_g400.1.mk	PAV_r1.0chr2	21581932	21584351	56.40 kDa	pH 9.78
		Pav_sc0001502.1_g480.1.mk	PAV_r1.0chr6	20119363	20120934	49.71 kDa	pH 7.61
		Pav_sc0001502.1_g510.1.mk	PAV_r1.0chr6	20134396	20135712	49.58 kDa	pH 7.00
		Pav_sc0002327.1_g410.1.mk	PAV_r1.0chr1	42726830	42731894	45.45 kDa	pH 8.30
		Pav_sc0003135.1_g190.1.mk	PAV_r1.0chr4	5234880	5240799	47.19 kDa	pH 8.96
Pyrus bretschneideri	PbrSnRK1	Pbr038418.1	Chr17	19073991	19078800	58.81 kDa	pH 8.36
	PbrSnRK2	Pbr003186.1/PbrSnRK2.1	Chr15	41233261	41237245	40.17 kDa	pH 6.52
		Pbr026536.1/PbrSnRK2.2	Chr8	4160916	4164639	40.12 kDa	pH 6.58
		Pbr040276.1/PbrSnRK2.3	Chr6	16755401	16758728	38.38 kDa	pH 6.71
		Pbr040625.1/PbrSnRK2.4	Chr15	36545790	36549538	36.64 kDa	pH 9.22
		Pbr040624.1/PbrSnRK2.5	Chr15	36541960	36544287	30.09 kDa	pH 5.40
		Pbr006341.1/PbrSnRK2.6	scaffold132.0.1	799382	801630	26.08 kDa	pH 5.03
		Pbr007881.1/PbrSnRK2.7	Chr15	20374526	20379303	44.26 kDa	pH 4.50
		Pbr025097.1/PbrSnRK2.8	Chr2	14036770	14040506	33.29 kDa	pH 4.33
		Pbr042784.1/PbrSnRK2.9	scaffold364.0	337528	342127	30.13 kDa	pH 4.37
		Pbr023607.1/PbrSnRK2.10	scaffold364.0	289329	293241	31.56 kDa	pH 4.57
	PbrSnRK3	Pbr000504.1	Chr5	24950107	24952268	52.04 kDa	pH 9.20
		Pbr003161.1	Chr2	21926798	21931377	50.68 kDa	pH 8.59
		Pbr003572.1	scaffold1158.0	87853	89701	51.00 kDa	pH 9.36
		Pbr007491.1	Chr15	38413552	38419012	51.10 kDa	pH 7.67
		Pbr007816.1	Chr1	1823077	1826756	48.74 kDa	pH 8.25
		Pbr010647.1	Chr15	12835426	12839862	50.53 kDa	pH 9.13
		Pbr011565.1	Chr11	25403417	25405889	53.67 kDa	pH 8.83
		Pbr011665.1	Chr6	18116683	18123297	50.90 kDa	pH 6.31
		Pbr013072.1	Chr3	22763880	22766497	52.09 kDa	pH 8.92
		Pbr013115.1	Chr3	22431966	22433979	51.61 kDa	pH 8.75
		Pbr014612.1	Chr12	4660284	4661735	54.65 kDa	pH 8.98
		Pbr014616.1	Chr12	4644525	4645865	50.19 kDa	pH 7.26
		Pbr014711.1	Chr13	5124406	5126030	48.23 kDa	pH 9.70
		Pbr015971.1	scaffold235.0	526619	529248	55.48 kDa	pH 8.52
		Pbr015975.1	scaffold235.0	579859	581518	49.16 kDa	pH 7.99
		Pbr016120.1	Chr10	3521730	3523693	55.34 kDa	pH 8.15
		Pbr016121.1	Chr10	3528604	3529995	51.76 kDa	pH 8.97
		Pbr018565.1	Chr13	7679861	7690736	45.86 kDa	pH 8.22
		Pbr019032.1	Chr8	14318721	14320721	49.59 kDa	pH 8.62
		Pbr020002.1	Chr15	5458702	5461003	50.23 kDa	pH 8.83
		Pbr022407.1	Chr17	3519219	3521163	52.57 kDa	pH 9.42
		Pbr034256.1	Chr15	11682777	11685059	43.77 kDa	pH 9.21
		Pbr035731.1	Chr11	25962472	25964686	43.44 kDa	pH 6.89
		Pbr037774.1	Chr16	5555693	5562205	50.91 kDa	pH 6.31
		Pbr041843.1	scaffold958.0.1	41764	47451	45.76 kDa	pH 6.27
		Pbr041844.1	scaffold958.0.1	100240	105927	45.76 kDa	pH 6.27
		Pbr042907.1	Chr10	6223214	6227972	52.48 kDa	pH 9.50
Prunus mume	PmSnRK1	Pm015932	Pm4	22161603	22164879	57.37 kDa	pH 8.71
	PmSnRK2	Pm002088	Pm1	16502492	16504984	40.05 kDa	pH 5.63
		Pm003761	Pm2	54486	58012	40.36 kDa	pH 6.52
		Pm004465	Pm2	5189600	5191980	38.36 kDa	pH 6.90
		Pm004466	Pm2	5193159	5198050	57.76 kDa	pH 6.26
		Pm021475	Pm6	9030732	9035068	41.26 kDa	pH 4.68
		Pm026453	Pm8	9942312	9946414	41.22 kDa	pH 4.49
		Pm029730	scaffold327	180494	183599	38.18 kDa	pH 6.19
	PmSnRK3	Pm000271	Pm1	1668346	1669740	52.14 kDa	pH 8.42
		Pm000275	Pm1	1685428	1686822	53.04 kDa	pH 8.80
		Pm001690	Pm1	12519274	12523450	41.37 kDa	pH 5.23
		Pm003063	Pm1	22944929	22946281	47.85 kDa	pH 7.22
		Pm003066	Pm1	22959937	22961463	57.79 kDa	pH 7.91
		Pm004339	Pm2	4163179	4167585	56.70 kDa	pH 6.93
		Pm005699	Pm2	12440531	12441880	50.70 kDa	pH 8.44
		Pm008498	Pm2	33557691	33561835	51.49 kDa	pH 7.16
		Pm009181	Pm2	39253266	39254375	40.27 kDa	pH 8.12
		Pm010242	Pm3	3387025	3388419	52.26 kDa	pH 9.02
		Pm010243	Pm3	3391914	3393374	54.69 kDa	pH 7.52
		Pm010458	Pm3	4546821	4551566	57.82 kDa	pH 8.45
		Pm018300	Pm5	17447016	17450222	51.41 kDa	pH 8.96
		Pm019034	Pm5	21810045	21811370	49.93 kDa	pH 9.58
		Pm027552	Pm8	15836106	15839921	40.39 kDa	pH 9.02
		Pm027719	Pm8	16682416	16683714	48.89 kDa	pH 9.16
Prunus persica	PpSnRK1	Prupe.3G262900.1	Pp03	24806493	24810977	60.36 kDa	pH 8.44
	PpSnRK2	Prupe.1G521600.1	Pp01	42774220	42776743	38.24 kDa	pH 7.13
		Prupe.1G521800.1	Pp01	42779380	42781677	40.84 kDa	pH 7.18
		Prupe.1G573300.1	Pp01	46728241	46732676	40.26 kDa	pH 6.59
		Prupe.5G054500.1	Pp05	5830703	5834590	38.18 kDa	pH 6.19
		Prupe.6G192200.1	Pp06	19944931	19947957	38.56 kDa	pH 5.45
		Prupe.7G138200.1	Pp07	15464403	15469428	40.95 kDa	pH 4.53
		Prupe.8G115900.1	Pp08	14305181	14310468	41.04 kDa	pH 4.68
	PpSnRK3	Prupe.1G026400.1	Pp01	1839105	1840662	47.75 kDa	pH 9.03
		Prupe.1G091700.1	Pp01	6909490	6913025	52.67 kDa	pH 7.71
		Prupe.1G105000.1	Pp01	8458781	8464307	51.31 kDa	pH 6.99
		Prupe.1G392900.1	Pp01	34974805	34976767	50.88 kDa	pH 8.03
		Prupe.1G539600.1	Pp01	44093995	44099079	51.12 kDa	pH 7.69
		Prupe.2G195900.1	Pp02	23340327	23344917	51.32 kDa	pH 8.91
		Prupe.2G261600.1	Pp02	27062705	27065556	49.88 kDa	pH 9.56
		Prupe.3G097900.1	Pp03	7505531	7506940	53.53 kDa	pH 8.59
		Prupe.4G062900.1	Pp04	3012360	3014902	52.12 kDa	pH 9.02
		Prupe.4G063100.1	Pp04	3017616	3019702	54.50 kDa	pH 7.78
		Prupe.4G085000.1	Pp04	4165713	4171764	51.38 kDa	pH 9.39
		Prupe.6G043300.1	Pp06	3165706	3167991	51.98 kDa	pH 8.35
		Prupe.6G043700.1	Pp06	3184043	3186693	52.92 kDa	pH 8.62
		Prupe.6G156900.1	Pp06	13963211	13970925	50.28 kDa	pH 7.33
		Prupe.6G290400.1	Pp06	26800421	26803360	55.42 kDa	pH 8.80
		Prupe.6G290700.1	Pp06	26826847	26829608	49.61 kDa	pH 6.94
		Prupe.7G244500.1	Pp07	20886040	20890002	50.49 kDa	pH 8.52
		Prupe.7G261300.1	Pp07	21709634	21711533	48.61 kDa	pH 9.30

## Sheet: S_Table2
Collibearity relationship among SnRKs genes in the same species
Species name	Synteny Gene 1	Synteny Gene 2
Rubus occidentalis	Ro01_G05070	Ro02_G02475
	Ro01_G29721	Ro02_G35920
	Ro01_G05070	Ro06_G16672
	Ro02_G02475	Ro06_G16672
	Ro03_G10625	Ro06_G05694
	Ro03_G10629	Ro06_G05691
	Ro06_G17584	Ro06_G28722
	Ro06_G05691	Ro07_G04717
Fragaria vesca	FvH4_1g01070.1	FvH4_2g41050.1
	FvH4_1g15440.1	FvH4_2g06910.1
	FvH4_1g20310.1	FvH4_5g36730.1
	FvH4_3g40220.1	FvH4_6g10210.1
	FvH4_3g40260.1	FvH4_6g10160.1
	FvH4_6g10210.1	FvH4_7g25640.1
Malus domestica	MD01G1163600	MD03G1059600
	MD01G1163600	MD04G1171600
	MD04G1171600	MD12G1185000
	MD01G1087300	MD07G1157500
	MD01G1035000	MD08G1187200
	MD01G1163600	MD11G1061700
	MD01G1163600	MD12G1185000
	MD01G1035000	MD15G1373000
	MD01G1035000	MD15G1321000
	MD02G1166500	MD15G1279000
	MD02G1030100	MD15G1171600
	MD03G1054700	MD04G1172200
	MD03G1054700	MD11G1056100
	MD03G1059600	MD11G1061700
	MD03G1054700	MD12G1185400
	MD04G1054400	MD06G1046300
	MD04G1172200	MD11G1056100
	MD04G1171600	MD12G1185000
	MD04G1172200	MD12G1185400
	MD05G1280400	MD10G1258700
	MD05G1298800	MD10G1278300
	MD08G1187200	MD15G1373000
	MD08G1206900	MD15G1390800
	MD08G1236500	MD15G1428500
	MD08G1187200	MD15G1321000
	MD09G1056200	MD17G1053700
	MD11G1061700	MD12G1185000
	MD11G1056100	MD12G1185400
	MD13G1203400	MD16G1204900
	MD13G1139700	MD16G1136100
	MD15G1321000	MD15G1373000
	MD15G1039300	MD17G1222800
Prunus avium	Pav_sc0000890.1_g510.1.mk	Pav_sc0000981.1_g200.1.mk
	Pav_sc0001205.1_g400.1.mk	Pav_sc0000375.1_g240.1.mk
	Pav_sc0001205.1_g400.1.mk	Pav_sc0001502.1_g480.1.mk
	Pav_sc0000375.1_g240.1.mk	Pav_sc0001502.1_g480.1.mk
	Pav_sc0000890.1_g510.1.mk	Pav_sc0000557.1_g1120.1.mk
	Pav_sc0000375.1_g180.1.mk	Pav_sc0001502.1_g510.1.mk
Pyrus bretschneideri	Pbr011565.1	Pbr013072.1
	Pbr007881.1	Pbr025097.1
	Pbr035731.1	Pbr013115.1
	Pbr011565.1	Pbr015971.1
	Pbr014616.1	Pbr013115.1
	Pbr014616.1	Pbr015975.1
	Pbr014612.1	Pbr015971.1
	Pbr018565.1	Pbr037774.1
	Pbr018565.1	Pbr037774.1
	Pbr014711.1	Pbr003572.1
	Pbr010647.1	Pbr003161.1
	Pbr003186.1	Pbr026536.1
	Pbr020002.1	Pbr019032.1
	Pbr037774.1	Pbr011665.1
	Pbr013072.1	Pbr015971.1
Prunus mume	Pm000271	Pm003063
	Pm000275	Pm003066
	Pm002088	Pm004465
	Pm003066	Pm019034
	Pm000275	Pm019034
	Pm005699	Pm027719
Prunus persica	Prupe.1G392900.1	Prupe.3G097900.1
	Prupe.1G521600.1	Prupe.6G192200.1
	Prupe.2G261600.1	Prupe.6G290400.1
	Prupe.2G261600.1	Prupe.6G043700.1
	Prupe.6G043300.1	Prupe.6G290700.1
	Prupe.6G043700.1	Prupe.6G290400.1
Pyrus bretschneideri and other 7 Rosaceae species	FvH4_1g01070.1	Ro02_G02475
	FvH4_2g41050.1	Ro02_G02475
	FvH4_1g01070.1	Ro01_G05070
	FvH4_1g03090.1	Ro01_G10353
	FvH4_1g15440.1	Ro01_G29721
	FvH4_1g15440.1	Ro02_G35920
	FvH4_2g06910.1	Ro01_G29721
	FvH4_2g06910.1	Ro02_G35920
	FvH4_2g41050.1	Ro01_G05070
	FvH4_2g41050.1	Ro06_G16672
	FvH4_3g05110.1	Ro03_G15310
	FvH4_3g07620.1	Ro06_G05691
	FvH4_3g07620.1	Ro03_G05264
	FvH4_3g40260.1	Ro06_G05694
	FvH4_4g02010.1	Ro04_G13567
	FvH4_4g21530.1	Ro04_G21539
	FvH4_5g20490.1	Ro03_G27603
	FvH4_5g28850.1	Ro05_G31301
	FvH4_5g33970.1	Ro05_G25912
	FvH4_6g10160.1	Ro03_G10625
	FvH4_6g10160.1	Ro06_G05694
	FvH4_6g47850.1	Ro06_G17584
	FvH4_6g47850.1	Ro06_G28722
	FvH4_7g17430.1	Ro07_G07887
	FvH4_7g25640.1	Ro03_G10629
	FvH4_7g25640.1	Ro06_G05691
	MD01G1087300	Ro07_G07887
	MD01G1163600	Ro03_G10629
	MD01G1163600	Ro06_G05691
	MD02G1030100	Ro01_G10353
	MD02G1166500	Ro01_G29721
	MD02G1166500	Ro02_G35920
	MD03G1054700	Ro03_G10625
	MD03G1054700	Ro06_G05694
	MD03G1059600	Ro03_G10629
	MD04G1054400	Ro03_G27603
	MD04G1171600	Ro03_G10629
	MD04G1171600	Ro06_G05691
	MD04G1172200	Ro03_G10625
	MD04G1172200	Ro06_G05694
	MD05G1280400	Ro03_G15310
	MD05G1298800	Ro03_G05264
	MD06G1046300	Ro03_G27603
	MD07G1157500	Ro07_G07887
	MD08G1206900	Ro05_G25912
	MD08G1236500	Ro05_G31301
	MD09G1056200	Ro06_G17584
	MD09G1056200	Ro06_G28722
	MD10G1088700	Ro02_G35920
	MD10G1258700	Ro03_G15310
	MD10G1278300	Ro03_G05264
	MD11G1056100	Ro03_G10625
	MD11G1056100	Ro06_G05694
	MD11G1061700	Ro03_G10629
	MD11G1061700	Ro06_G05691
	MD13G1139700	Ro04_G21539
	MD13G1203400	Ro04_G13567
	MD15G1039300	Ro02_G02475
	MD15G1039300	Ro01_G05070
	MD15G1039300	Ro06_G16672
	MD15G1153500	Ro01_G05070
	MD15G1171600	Ro01_G10353
	MD15G1279000	Ro01_G29721
	MD15G1390800	Ro05_G25912
	MD15G1428500	Ro05_G31301
	MD16G1136100	Ro04_G21539
	MD16G1204900	Ro04_G13567
	MD17G1053700	Ro06_G17584
	MD17G1053700	Ro06_G28722
	MD17G1222800	Ro02_G02475
	MD17G1222800	Ro06_G16672
	Pav_sc0000037.1_g560.1.mk	Ro03_G05264
	Pav_sc0000065.1_g200.1.mk	Ro04_G21539
	Pav_sc0000375.1_g180.1.mk	Ro03_G10625
	Pav_sc0000375.1_g180.1.mk	Ro06_G05694
	Pav_sc0000375.1_g240.1.mk	Ro03_G10629
	Pav_sc0000375.1_g240.1.mk	Ro06_G05691
	Pav_sc0000484.1_g390.1.mk	Ro06_G17584
	Pav_sc0000484.1_g390.1.mk	Ro06_G28722
	Pav_sc0000549.1_g120.1.mk	Ro03_G27603
	Pav_sc0000557.1_g1120.1.mk	Ro02_G02475
	Pav_sc0000557.1_g1120.1.mk	Ro01_G05070
	Pav_sc0000586.1_g940.1.mk	Ro07_G07887
	Pav_sc0000704.1_g960.1.mk	Ro01_G10353
	Pav_sc0000890.1_g510.1.mk	Ro02_G02475
	Pav_sc0000890.1_g510.1.mk	Ro01_G05070
	Pav_sc0000908.1_g140.1.mk	Ro06_G16672
	Pav_sc0000908.1_g140.1.mk	Ro02_G35920
	Pav_sc0000981.1_g200.1.mk	Ro02_G02475
	Pav_sc0000981.1_g200.1.mk	Ro06_G16672
	Pav_sc0000998.1_g090.1.mk	Ro04_G13567
	Pav_sc0001196.1_g350.1.mk	Ro05_G31301
	Pav_sc0001205.1_g400.1.mk	Ro03_G10629
	Pav_sc0001205.1_g400.1.mk	Ro06_G05691
	Pav_sc0001242.1_g120.1.mk	Ro01_G29721
	Pav_sc0001242.1_g120.1.mk	Ro02_G35920
	Pav_sc0001502.1_g480.1.mk	Ro03_G10629
	Pav_sc0001502.1_g480.1.mk	Ro06_G05691
	Pav_sc0001502.1_g510.1.mk	Ro03_G10625
	Pav_sc0001502.1_g510.1.mk	Ro06_G05694
	Pav_sc0002327.1_g410.1.mk	Ro05_G25912
	Pav_sc0003135.1_g190.1.mk	Ro03_G15310
	Pbr003161.1	Ro01_G10353
	Pbr003186.1	Ro05_G31301
	Pbr007491.1	Ro05_G25912
	Pbr007816.1	Ro07_G07887
	Pbr007881.1	Ro01_G29721
	Pbr010647.1	Ro01_G10353
	Pbr011565.1	Ro03_G10629
	Pbr011565.1	Ro06_G05691
	Pbr011665.1	Ro04_G21539
	Pbr013072.1	Ro03_G10629
	Pbr013072.1	Ro06_G05691
	Pbr013115.1	Ro03_G10625
	Pbr013115.1	Ro06_G05694
	Pbr014612.1	Ro06_G05691
	Pbr014616.1	Ro03_G10625
	Pbr014616.1	Ro06_G05694
	Pbr014711.1	Ro04_G13567
	Pbr016120.1	Ro03_G10625
	Pbr016120.1	Ro03_G05264
	Pbr018565.1	Ro04_G21539
	Pbr018565.1	Ro04_G21539
	Pbr019032.1	Ro02_G02475
	Pbr020002.1	Ro02_G02475
	Pbr020002.1	Ro01_G05070
	Pbr020002.1	Ro06_G16672
	Pbr022407.1	Ro06_G16672
	Pbr025097.1	Ro01_G29721
	Pbr025097.1	Ro02_G35920
	Pbr026536.1	Ro05_G31301
	Pbr034256.1	Ro01_G05070
	Pbr037774.1	Ro04_G21539
	Pbr038418.1	Ro06_G17584
	Pbr038418.1	Ro06_G28722
	Pbr040276.1	Ro03_G27603
	Pbr042907.1	Ro03_G15310
	Pm000271	Ro03_G10625
	Pm000271	Ro06_G05694
	Pm000275	Ro03_G10629
	Pm000275	Ro06_G05691
	Pm003063	Ro03_G10625
	Pm003063	Ro06_G05694
	Pm003066	Ro03_G10629
	Pm003066	Ro06_G05691
	Pm003761	Ro05_G31301
	Pm004339	Ro05_G25912
	Pm005699	Ro02_G02475
	Pm005699	Ro01_G05070
	Pm005699	Ro06_G16672
	Pm008498	Ro04_G21539
	Pm009181	Ro04_G13567
	Pm010242	Ro03_G05264
	Pm010458	Ro02_G02475
	Pm010458	Ro06_G16672
	Pm010458	Ro03_G15310
	Pm015932	Ro06_G17584
	Pm015932	Ro06_G28722
	Pm018300	Ro07_G07887
	Pm019034	Ro03_G10629
	Pm019034	Ro06_G05691
	Pm021475	Ro02_G35920
	Pm026453	Ro01_G29721
	Pm026453	Ro02_G35920
	Pm027552	Ro01_G10353
	Pm027719	Ro02_G02475
	Pm027719	Ro01_G05070
	Prupe.1G026400.1	Ro04_G13567
	Prupe.1G105000.1	Ro04_G21539
	Prupe.1G392900.1	Ro02_G02475
	Prupe.1G392900.1	Ro01_G05070
	Prupe.1G392900.1	Ro06_G16672
	Prupe.1G539600.1	Ro05_G25912
	Prupe.1G573300.1	Ro05_G31301
	Prupe.2G195900.1	Ro07_G07887
	Prupe.2G261600.1	Ro03_G10629
	Prupe.2G261600.1	Ro06_G05691
	Prupe.3G097900.1	Ro02_G02475
	Prupe.3G097900.1	Ro06_G16672
	Prupe.3G262900.1	Ro06_G17584
	Prupe.3G262900.1	Ro06_G28722
	Prupe.4G062900.1	Ro03_G05264
	Prupe.4G085000.1	Ro03_G15310
	Prupe.5G054500.1	Ro03_G27603
	Prupe.6G043300.1	Ro03_G10625
	Prupe.6G043300.1	Ro06_G05694
	Prupe.6G043700.1	Ro03_G10629
	Prupe.6G043700.1	Ro06_G05691
	Prupe.7G138200.1	Ro01_G29721
	Prupe.7G138200.1	Ro02_G35920
	Prupe.7G244500.1	Ro01_G10353
	Prupe.7G261300.1	Ro02_G02475
	Prupe.7G261300.1	Ro01_G05070
	Prupe.8G115900.1	Ro02_G35920

## Sheet: S_Table3
Gene duplication events identified and Ka, Ks and Ka/Ks analysis in SnRK gene family
Species name	Duplication type	Duplicate 1	Location	Duplicate 2	Location	Ka	Ks	Ka/Ks	P-Value
Rubus occidentalis	WGD	Ro01_G05070	Ro01:570936	Ro02_G02475	Ro02:221145	0.286332	4.11947	0.069507	5.61476e-93
		Ro01_G29721	Ro01:7234304	Ro02_G35920	Ro02:36191620	0.134392	2.28817	0.0587332	5.58557e-48
		Ro01_G05070	Ro01:570936	Ro06_G16672	Ro06:9108647	0.338453	4.18709	0.0808326	6.29699e-66
		Ro02_G02475	Ro02:221145	Ro06_G16672	Ro06:9108647	0.180341	4.16721	0.0432762	2.84392e-90
		Ro03_G10625	Ro03:3425002	Ro06_G05694	Ro06:29384012	0.244384	4.05622	0.0602492	3.61746e-70
		Ro03_G10629	Ro03:3458849	Ro06_G05691	Ro06:29405353	0.195552	1.879	0.104072	7.9764e-71
		Ro06_G17584	Ro06:2592669	Ro06_G28722	Ro06:24014736	0.0443944	0.0605149	0.73361	0.21524
		Ro06_G05691	Ro06:29405353	Ro07_G04717	Ro07:36808660	0.300776	1.50587	0.199737	1.20377e-31
	TD	Ro03_G05264	Ro03:40173354	Ro03_G05263	Ro03:40177397	0.305681	4.22388	0.0723697	2.66696e-100
	PD	Ro02_G35920	Ro02:36191620	Ro02_G15248	Ro02:36214891	0.152955	0.202192	0.756483	0.195082
		Ro06_G05694	Ro06:29384012	Ro06_G05691	Ro06:29405353	0.411097	4.19612	0.0979708	1.6805e-79
	TRD	Ro03_G27603	Ro03:18217001	Ro03_G15310	Ro03:38715769	0.183985	4.13055	0.0445425	8.25001e-69
		Ro05_G31301	Ro05:27653543	Ro02_G35920	Ro02:36191620	0.192544	3.93704	0.0489057	2.02033e-72
	DSD	Ro01_G05070	Ro01:570936	Ro06_G05691	Ro06:29405353	0.248235	4.19602	0.0591595	1.48461e-126
		Ro01_G10353	Ro01:1477792	Ro05_G25912	Ro05:36553281	0.245665	1.7813	0.137913	1.27715e-48
		Ro01_G29721	Ro01:7234304	Ro02_G15248	Ro02:36214891	0.127279	1.8064	0.0704601	3.12485e-52
		Ro02_G02475	Ro02:221145	Ro03_G10629	Ro03:3458849	0.322601	4.19942	0.0768203	5.80927e-111
		Ro02_G15248	Ro02:36214891	Ro05_G31685	Ro05:38848717	0.229383	3.88472	0.0590474	1.13123e-42
		Ro03_G05263	Ro03:40177397	Ro06_G05691	Ro06:29405353	0.277444	4.30381	0.0644648	2.65634e-106
		Ro03_G05264	Ro03:40173354	Ro06_G05691	Ro06:29405353	0.304763	4.27373	0.0713108	1.07121e-94
		Ro03_G10625	Ro03:3425002	Ro03_G05264	Ro03:40173354	0.307789	4.1037	0.0750029	4.53799e-76
		Ro03_G15310	Ro03:38715769	Ro07_G07887	Ro07:983519	0.169703	4.18543	0.0405462	6.45535e-102
		Ro03_G27603	Ro03:18217001	Ro07_G07887	Ro07:983519	0.17615	2.69143	0.0654485	2.91788e-59
		Ro04_G13567	Ro04:23018026	Ro01_G05070	Ro01:570936	0.424901	4.05574	0.104765	4.08203e-76
		Ro05_G25912	Ro05:36553281	Ro07_G07887	Ro07:983519	0.316265	4.2291	0.074783	6.36244e-59
		Ro05_G31301	Ro05:27653543	Ro02_G15248	Ro02:36214891	0.222189	3.88757	0.0571537	7.2488e-53
		Ro06_G05694	Ro06:29384012	Ro03_G05264	Ro03:40173354	0.310481	4.18383	0.0742098	1.20846e-69
		Ro06_G16672	Ro06:9108647	Ro06_G05691	Ro06:29405353	0.372402	4.27702	0.0870703	1.89242e-52
		Ro06_G17584	Ro06:2592669	Ro03_G15310	Ro03:38715769	0.662273	4.24226	0.156113	3.11267e-44
		Ro06_G28722	Ro06:24014736	Ro03_G15310	Ro03:38715769	0.673828	4.26612	0.157949	6.0325e-40
		Ro07_G07887	Ro07:983519	Ro01_G05070	Ro01:570936	0.362896	4.13827	0.0876926	7.95461e-91
Fragaria vesca	WGD	FvH4_1g01070.1	Fvb1:549851	FvH4_2g41050.1	Fvb2:29122748	0.309477	4.10564	0.0753784	3.7768e-78
		FvH4_1g15440.1	Fvb1:8751657	FvH4_2g06910.1	Fvb2:5703998	0.0974621	2.53497	0.038447	5.53293e-83
		FvH4_1g20310.1	Fvb1:12539890	FvH4_5g36730.1	Fvb5:26930498	0.122245	2.71976	0.0449469	5.44954e-69
		FvH4_3g40220.1	Fvb3:33993640	FvH4_6g10210.1	Fvb6:6064267	0.188607	2.11082	0.0893528	6.26224e-72
		FvH4_3g40260.1	Fvb3:34016903	FvH4_6g10160.1	Fvb6:6029924	0.261539	4.06183	0.0643895	3.2248e-62
		FvH4_6g10210.1	Fvb6:6064267	FvH4_7g25640.1	Fvb7:19572742	0.31812	1.9116	0.166416	7.70802e-44
	TD	FvH4_3g07620.1	Fvb3:4488052	FvH4_3g07630.1	Fvb3:4492825	0.321248	4.26303	0.0753568	8.79335e-98
	PD	FvH4_6g10160.1	Fvb6:6029924	FvH4_6g10210.1	Fvb6:6064267	0.415261	4.19683	0.0989465	2.04561e-79
	TRD	FvH4_3g27610.1	Fvb3:20681263	FvH4_3g05110.1	Fvb3:2958451	0.182251	4.29476	0.0424357	2.29421e-94
		FvH4_4g08900.1	Fvb4:9796009	FvH4_3g05110.1	Fvb3:2958451	0.399274	4.24721	0.0940084	7.0612e-63
		FvH4_4g13050.1	Fvb4:16683492	FvH4_5g20490.1	Fvb5:12133328	0.238852	4.08947	0.0584066	2.82047e-64
		FvH4_5g28850.1	Fvb5:19967776	FvH4_2g06910.1	Fvb2:5703998	0.206894	4.03922	0.0512212	1.23035e-73
	DSD	FvH4_1g01070.1	Fvb1:549851	FvH4_6g10210.1	Fvb6:6064267	0.264351	4.19951	0.0629481	9.73919e-123
		FvH4_1g17990.1	Fvb1:10459750	FvH4_3g05110.1	Fvb3:2958451	0.394667	4.09307	0.0964233	2.91477e-39
		FvH4_1g20310.1	Fvb1:12539890	FvH4_5g20490.1	Fvb5:12133328	0.157207	4.02104	0.0390962	3.41799e-74
		FvH4_2g06910.1	Fvb2:5703998	FvH4_5g20490.1	Fvb5:12133328	0.172711	3.9852	0.043338	1.15798e-92
		FvH4_2g41050.1	Fvb2:29122748	FvH4_6g10210.1	Fvb6:6064267	0.356502	4.26445	0.0835987	2.53696e-96
		FvH4_3g05110.1	Fvb3:2958451	FvH4_7g17430.1	Fvb7:14814307	0.165885	4.23826	0.03914	7.80879e-106
		FvH4_3g07620.1	Fvb3:4488052	FvH4_6g10210.1	Fvb6:6064267	0.320344	4.22415	0.0758363	2.4059e-114
		FvH4_3g07630.1	Fvb3:4492825	FvH4_6g10210.1	Fvb6:6064267	0.24206	4.27294	0.0566496	4.48696e-96
		FvH4_3g26940.1	Fvb3:20047664	FvH4_3g07630.1	Fvb3:4492825	0.715093	3.83233	0.186595	6.5796e-30
		FvH4_3g27610.1	Fvb3:20681263	FvH4_7g17430.1	Fvb7:14814307	0.178257	4.23661	0.0420753	1.10303e-114
		FvH4_3g40260.1	Fvb3:34016903	FvH4_3g07620.1	Fvb3:4488052	0.308074	4.08322	0.0754488	1.88411e-77
		FvH4_4g02010.1	Fvb4:1798579	FvH4_6g10210.1	Fvb6:6064267	0.438691	4.20023	0.104445	2.30441e-88
		FvH4_4g08900.1	Fvb4:9796009	FvH4_1g03090.1	Fvb1:1745933	0.420768	4.22844	0.0995091	6.29496e-46
		FvH4_4g13050.1	Fvb4:16683492	FvH4_5g28850.1	Fvb5:19967776	0.170337	0.38877	0.438143	2.46727e-06
		FvH4_4g21530.1	Fvb4:24576398	FvH4_3g05110.1	Fvb3:2958451	0.390647	2.95936	0.132004	2.87786e-44
		FvH4_5g20490.1	Fvb5:12133328	FvH4_5g36730.1	Fvb5:26930498	0.184452	2.4446	0.0754527	5.46973e-56
		FvH4_5g28850.1	Fvb5:19967776	FvH4_5g20490.1	Fvb5:12133328	0.172424	3.96287	0.04351	6.22932e-100
		FvH4_5g33970.1	Fvb5:24641188	FvH4_3g05110.1	Fvb3:2958451	0.358376	4.26566	0.0840141	1.969e-72
		FvH4_6g10160.1	Fvb6:6029924	FvH4_3g07620.1	Fvb3:4488052	0.322839	4.10742	0.0785989	6.85507e-60
		FvH4_6g47850.1	Fvb6:36181838	FvH4_4g21530.1	Fvb4:24576398	0.641623	4.25035	0.150958	5.17396e-35
		FvH4_7g12170.1	Fvb7:11065623	FvH4_2g41050.1	Fvb2:29122748	0.56884	3.822	0.148833	6.98098e-41
Malus domestica	WGD	MD01G1163600	Md01:26845576	MD03G1059600	Md03:4813143	0.247512	2.16995	0.114063	1.34357e-57
		MD01G1163600	Chr03:20387379	MD04G1171600	Md04:26320357	0.23159	2.05491	0.112701	9e-147
		MD04G1171600	Md04:26320357	MD12G1185000	Md12:26597295	0.0361785	0.201619	0.179439	2e-218
		MD01G1087300	Md01:19657704	MD07G1157500	Md07:22903602	0.0239898	0.197127	0.121697	2.13708e-18
		MD01G1035000	Md01:11830597	MD08G1187200	Md08:23559254	0.132767	4.00691	0.0331345	8.34603e-81
		MD01G1163600	Md01:26845576	MD11G1061700	Md11:5378187	0.240436	1.89421	0.126932	4.74463e-57
		MD01G1163600	Md01:26845576	MD12G1185000	Md12:26597294	0.196622	2.55428	0.0769772	2.98615e-74
		MD01G1035000	Md01:11830597	MD15G1373000	Md15:45551913	0.120577	3.96306	0.0304251	1.14855e-102
		MD01G1035000	Md01:11830597	MD15G1321000	Md15:33476222	0.016701	0.164386	0.101596	1.33696e-12
		MD02G1166500	Md02:14266243	MD15G1279000	Md15:24695316	0.0257098	0.175686	0.14634	8.74381e-13
		MD02G1030100	Md02:2328625	MD15G1171600	Md15:13326362	0.0330022	0.19278	0.171192	7.14505e-14
		MD03G1054700	Md03:4364592	MD04G1172200	Md04:26364435	0.210386	3.97662	0.0529058	9.44949e-73
		MD03G1054700	Md03:4364592	MD11G1056100	Md11:4775634	0.0365122	0.421473	0.0866301	1.61656e-31
		MD03G1059600	Md03:4813143	MD11G1061700	Md11:5378187	0.044614	0.142377	0.313351	1.89301e-07
		MD03G1054700	Md03:4364592	MD12G1185400	Md12:26664329	0.227383	3.94083	0.0576992	2.05077e-72
		MD04G1054400	Md04:6509067	MD06G1046300	Md06:6293616	0.027393	0.163549	0.167491	9.27042e-11
		MD04G1172200	Md04:26364435	MD11G1056100	Md11:4775634	0.216653	4.01355	0.0539804	1.31856e-61
		MD04G1171600	Md04:26320356	MD12G1185000	Md12:26597294	0.0351675	0.205204	0.171378	9.49502e-16
		MD04G1172200	Md04:26364435	MD12G1185400	Md12:26664329	0.0426083	0.442851	0.0962136	3.60536e-31
		MD05G1280400	Md05:41438753	MD10G1258700	Md10:35272524	0.0619928	0.182052	0.340523	1.5459e-06
		MD05G1298800	Md05:43227442	MD10G1278300	Md10:36891711	0.0315349	0.228117	0.13824	4.50687e-22
		MD08G1187200	Md08:23559254	MD15G1373000	Md15:45551913	0.0443254	0.113767	0.389617	0.0013921
		MD08G1206900	Md08:26867421	MD15G1390800	Md15:48511597	0.0130835	0.135083	0.0968553	1.26171e-15
		MD08G1236500	Md08:30418867	MD15G1428500	Md15:52919101	0.0371008	0.107036	0.346621	0.000239777
		MD08G1187200	Md08:23559254	MD15G1321000	Md15:33476222	0.137684	4.03264	0.0341423	1.10256e-70
		MD09G1056200	Md09:3719819	MD17G1053700	Md17:4171188	0.0213882	0.119161	0.17949	1.78169e-11
		MD11G1061700	Md11:5378187	MD12G1185000	Md12:26597294	0.196048	1.79407	0.109276	7.89771e-67
		MD11G1056100	Md11:4775634	MD12G1185400	Md12:26664329	0.243002	3.9885	0.0609257	5.81391e-69
		MD13G1203400	Md13:18318420	MD16G1204900	Md16:18892210	0.0474951	0.350064	0.135676	1.67843e-24
		MD13G1139700	Md13:10758064	MD16G1136100	Md16:10427110	0.0368403	0.168293	0.218905	1.04465e-11
		MD15G1321000	Md15:33476222	MD15G1373000	Md15:45551913	0.131341	3.9864	0.0329473	8.68643e-91
		MD15G1039300	Md15:2754045	MD17G1222800	Md17:27163427	0.210159	4.21065	0.0499114	2.3455e-101
	TD	MD05G1298800	Md05:43227442	MD05G1298900	Md05:43234136	0.336221	4.26303	0.0788689	3.5349e-101
		MD10G1278300	Md10:36891711	MD10G1278400	Md10:36900529	0.32466	4.29119	0.0756574	8.8188e-96
	TRD	MD03G1163600	Md03:20387378	MD07G1157500	Md07:22903602	0.184178	4.32065	0.0426274	1.21574e-85
	DSD	MD01G1035000	Md01:11830597	MD10G1089100	Md10:13174756	0.178008	4.1292	0.0431095	3.14693e-68
		MD01G1087300	Md01:19657704	MD10G1258700	Md10:35272524	0.17983	4.27577	0.042058	5.64818e-95
		MD01G1163600	Md01:26845576	MD05G1298900	Md05:43234136	0.249824	4.26212	0.058615	5.01936e-86
		MD02G1030100	Md02:2328625	MD15G1390800	Md15:48511597	0.222913	4.29349	0.0519189	2.44343e-74
		MD02G1166500	Md02:14266243	MD10G1089100	Md10:13174756	0.0921333	3.21356	0.0286701	2.66559e-88
		MD03G1054700	Md03:4364592	MD10G1278300	Md10:36891711	0.316379	4.09562	0.0772482	1.72294e-92
		MD03G1059600	Md03:4813143	MD12G1185000	Md12:26597294	0.18121	1.40171	0.129278	8.58874e-59
		MD03G1163600	Md03:20387378	MD10G1258700	Md10:35272524	0.174741	3.01492	0.0579585	1.83498e-83
		MD04G1054400	Md04:6509067	MD10G1089100	Md10:13174756	0.175904	4.06005	0.0433255	2.4584e-102
		MD04G1172200	Md04:26364435	MD05G1298800	Md05:43227442	0.321066	4.09042	0.0784922	2.51221e-84
		MD05G1280400	Md05:41438753	MD07G1157500	Md07:22903602	0.190936	4.16881	0.0458011	7.85695e-83
		MD05G1298800	Md05:43227442	MD10G1278400	Md10:36900529	0.327598	4.29824	0.0762167	3.31717e-92
		MD05G1298900	Md05:43234136	MD10G1278400	Md10:36900529	0.0333971	0.125303	0.266531	5.47717e-08
		MD06G1046300	Md06:6293616	MD10G1089100	Md10:13174756	0.176176	4.06455	0.0433445	1.07042e-87
		MD07G1157500	Md07:22903602	MD10G1258700	Md10:35272524	0.164639	4.27213	0.0385378	1.09281e-105
		MD08G1206900	Md08:26867421	MD15G1171600	Md15:13326362	0.215329	2.24351	0.0959787	7.89507e-65
		MD08G1236500	Md08:30418867	MD04G1054400	Md04:6509067	0.200248	4.01995	0.0498135	1.50774e-108
		MD09G1056200	Md09:3719819	MD03G1163600	Md03:20387378	0.548457	4.1367	0.132583	2.48919e-61
		MD10G1089100	Md10:13174756	MD15G1279000	Md15:24695316	0.0984326	1.91937	0.0512838	1.31384e-78
		MD10G1278300	Md10:36891711	MD05G1298900	Md05:43234136	0.331301	4.27786	0.0774455	6.29127e-107
		MD10G1278400	Md10:36900529	MD12G1185000	Md12:26597294	0.221192	4.2833	0.0516405	1.16917e-84
		MD11G1056100	Md11:4775634	MD10G1278300	Md10:36891711	0.316983	4.12605	0.0768248	1.02666e-90
		MD12G1185400	Md12:26664329	MD10G1278300	Md10:36891711	0.344774	4.10442	0.0840007	4.44645e-78
		MD13G1139700	Md13:10758064	MD10G1258700	Md10:35272524	0.337484	4.30862	0.0783278	1.31021e-67
		MD13G1203400	Md13:18318420	MD10G1258700	Md10:35272524	0.462704	4.22154	0.109605	1.04345e-93
		MD13G1265500	Md13:34273816	MD03G1163600	Md03:20387378	0.393644	4.24393	0.0927546	8.35291e-67
		MD15G1039300	Md15:2754045	MD12G1185000	Md12:26597294	0.303531	4.18993	0.072443	3.87642e-110
		MD15G1153500	Md15:11383158	MD05G1298900	Md05:43234136	0.291183	4.12702	0.0705553	1.77228e-123
		MD15G1171600	Md15:13326362	MD15G1390800	Md15:48511597	0.214935	2.98416	0.0720253	3.02349e-70
		MD15G1279000	Md15:24695316	MD04G1054400	Md04:6509067	0.197201	4.00345	0.0492578	1.46548e-101
		MD15G1390800	Md15:48511597	MD03G1163600	Md03:20387378	0.315378	4.28333	0.0736292	1.15985e-83
		MD15G1428500	Md15:52919101	MD04G1054400	Md04:6509067	0.179385	3.98198	0.045049	0
		MD16G1136100	Md16:10427110	MD10G1258700	Md10:35272524	0.344276	4.30006	0.0800632	1.07851e-65
		MD16G1204900	Md16:18892210	MD15G1153500	Md15:11383158	0.390523	4.04131	0.0966326	8.14021e-62
		MD17G1053700	Md17:4171188	MD03G1163600	Md03:20387378	0.506705	4.12188	0.122931	1.33573e-71
		MD17G1222800	Md17:27163427	MD05G1298900	Md05:43234136	0.361276	4.27763	0.0844572	1.40608e-85
Prunus avium	WGD	Pav_sc0000890.1_g510.1.mk	PAV1:29638265	Pav_sc0000981.1_g200.1.mk	PAV3:7229762	0.221311	4.0574	0.0545451	1.70515e-71
		Pav_sc0001205.1_g400.1.mk	PAV2:21581932	Pav_sc0000375.1_g240.1.mk	PAV6:1780351	0.352199	0.78201	0.450377	2e-96
		Pav_sc0001205.1_g400.1.mk	PAV2:21581932	Pav_sc0001502.1_g480.1.mk	PAV6:20119363	0.225003	0.779759	0.288554	4e-136
		Pav_sc0000375.1_g240.1.mk	PAV6:1780351	Pav_sc0001502.1_g480.1.mk	PAV6:20119363	0.319164	0.897936	0.355442	3e-101
		Pav_sc0000890.1_g510.1.mk	PAV1:29638265	Pav_sc0000557.1_g1120.1.mk	PAV7:19230410	0.298728	4.08245	0.0731737	1.11125e-77
		Pav_sc0000375.1_g180.1.mk	PAV6:1798410	Pav_sc0001502.1_g510.1.mk	PAV6:20134395	0.234694	4.11335	0.0570567	2.45033e-64
	PD	Pav_sc0000037.1_g560.1.mk	PAV4:3683975	Pav_sc0000037.1_g580.1.mk	PAV4:3689011	0.310614	4.22581	0.0735041	2.1214e-128
	TRD	Pav_sc0000499.1_g180.1.mk	PAV6:12586258	Pav_sc0003135.1_g190.1.mk	PAV4:5234879	0.172939	4.1055	0.0421237	1.38678e-66
		Pav_sc0001196.1_g350.1.mk	PAV1:39665604	Pav_sc0001242.1_g120.1.mk	PAV7:12293816	0.217057	3.87066	0.0560774	4.55504e-69
	DSD	Pav_sc0000037.1_g560.1.mk	PAV4:3683975	Pav_sc0000557.1_g1120.1.mk	PAV7:19230410	0.263032	4.19913	0.0626397	6.8026e-106
		Pav_sc0000037.1_g580.1.mk	PAV4:3689011	Pav_sc0000557.1_g1120.1.mk	PAV7:19230410	0.271923	4.14258	0.065641	3.7373e-87
		Pav_sc0000308.1_g280.1.mk	PAV1:5280174	Pav_sc0003135.1_g190.1.mk	PAV4:5234879	0.379638	4.05407	0.0936438	1.16914e-46
		Pav_sc0000375.1_g180.1.mk	PAV6:1798410	Pav_sc0000037.1_g560.1.mk	PAV4:3683975	0.399965	4.23084	0.0945356	2.29332e-76
		Pav_sc0000375.1_g240.1.mk	PAV6:1780350	Pav_sc0000037.1_g580.1.mk	PAV4:3689011	0.316537	4.18552	0.0756267	6.53289e-79
		Pav_sc0000484.1_g390.1.mk	PAV3:19218121	Pav_sc0003135.1_g190.1.mk	PAV4:5234879	0.574524	4.15401	0.138306	2.46796e-49
		Pav_sc0000499.1_g180.1.mk	PAV6:12586258	Pav_sc0000704.1_g960.1.mk	PAV7:18337732	0.329097	4.11897	0.079898	6.18085e-55
		Pav_sc0000549.1_g120.1.mk	PAV5:5571477	Pav_sc0000908.1_g140.1.mk	PAV8:10464291	0.22761	3.9002	0.0583585	4.93423e-47
		Pav_sc0000557.1_g1120.1.mk	PAV7:19230410	Pav_sc0003135.1_g190.1.mk	PAV4:5234879	0.316908	4.14057	0.0765373	4.18219e-110
		Pav_sc0000639.1_g120.1.mk	PAV6:13847032	Pav_sc0001196.1_g350.1.mk	PAV1:39665604	0.282031	3.86183	0.0730306	6.36354e-47
		Pav_sc0000704.1_g960.1.mk	PAV7:18337732	Pav_sc0002327.1_g410.1.mk	PAV1:42726829	0.223653	4.11059	0.0544089	5.20718e-59
		Pav_sc0000908.1_g140.1.mk	PAV8:10464291	Pav_sc0001242.1_g120.1.mk	PAV7:12293816	0.0936696	1.40468	0.0666837	1.21547e-48
		Pav_sc0000981.1_g200.1.mk	PAV3:7229762	Pav_sc0000037.1_g560.1.mk	PAV4:3683975	0.430808	4.09136	0.105297	2.97174e-48
		Pav_sc0000998.1_g090.1.mk	PAV1:1889406	Pav_sc0000557.1_g1120.1.mk	PAV7:19230410	0.444227	4.0864	0.108708	4.60315e-48
		Pav_sc0001502.1_g480.1.mk	PAV6:20119362	Pav_sc0000037.1_g560.1.mk	PAV4:3683975	0.247039	4.10252	0.0602164	7.83374e-73
		Pav_sc0001502.1_g510.1.mk	PAV6:20134395	Pav_sc0000037.1_g580.1.mk	PAV4:3689011	0.304222	4.17273	0.0729072	1.4017e-110
		Pav_sc0002327.1_g410.1.mk	PAV1:42726829	Pav_sc0003135.1_g190.1.mk	PAV4:5234879	0.34584	4.13444	0.0836485	8.30673e-56
		Pav_sc0003135.1_g190.1.mk	PAV4:5234879	Pav_sc0000037.1_g560.1.mk	PAV4:3683975	0.342229	4.2269	0.0809644	2.55707e-76
		Pav_sc0004242.1_g010.1.mk	PAV0:74194024	Pav_sc0000499.1_g180.1.mk	PAV6:12586258	NA	NA	NA	NA
Pyrus bretschneideri	WGD	Pbr011565.1	Pb11:25403416	Pbr013072.1	Pb3:22763879	0.0414829	0.174801	0.237315	1.98935e-11
		Pbr007881.1	Pb15:20374526	Pbr025097.1	Pb2:14036770	0.02894	0.109667	0.26389	2e-135
		Pbr035731.1	Pb11:25962471	Pbr013115.1	Pb3:22431965	0.0273133	0.470568	0.0580432	5.91739e-33
		Pbr011565.1	Pb11:25403416	Pbr015971.1	scaffold235.0:526618	0.204348	1.58482	0.128941	2.041e-60
		Pbr014616.1	Pb12:4644524	Pbr013115.1	Pb3:22431965	0.255077	4.01869	0.0634726	6.99351e-69
		Pbr014616.1	Pb12:4644524	Pbr015975.1	scaffold235.0:579858	0.0528385	0.494078	0.106944	1.73288e-31
		Pbr014612.1	Pb12:4660283	Pbr015971.1	scaffold235.0:526618	0.0301984	0.239459	0.126111	1.33894e-21
		Pbr018565.1	Pb13:7679860	Pbr037774.1	Pb16:5555692	0.0441958	0.147753	0.29912	1.52702e-07
		Pbr018565.1	Pb13:7679860	Pbr037774.1	Pb16:5555692	0.0441958	0.147753	0.29912	1.52702e-07
		Pbr014711.1	Pb13:5124405	Pbr003572.1	scaffold1158.0:87852	0.0480534	0.401067	0.119814	1.20464e-28
		Pbr010647.1	Pb15:12835425	Pbr003161.1	Pb2:21926797	0.0473228	0.208908	0.226525	1.38665e-11
		Pbr003186.1	Pb15:41233260	Pbr026536.1	Pb8:4160915	0.0261726	0.12082	0.216625	1.38441e-06
		Pbr020002.1	Pb15:5458701	Pbr019032.1	Pb8:14318720	0.0415655	0.221836	0.18737	2.19042e-13
		Pbr037774.1	Pb16:5555692	Pbr011665.1	Pb6:18116682	0.00097529	0.00593454	0.164341	0.138858
		Pbr013072.1	Pb3:22763879	Pbr015971.1	scaffold235.0:526618	0.183673	1.6168	0.113603	3.32666e-65
	TD	Pbr016120.1	Pb10:3521729	Pbr016121.1	Pb10:3528603	0.316938	4.26026	0.074394	3.24772e-111
		Pbr041843.1	scaffold958.0.1:41763	Pbr041844.1	scaffold958.0.1:100239	NA	NA	NA	NA
	DSD	Pbr000504.1	Pb5:24950106	Pbr016121.1	Pb10:3528603	0.0341543	0.14001	0.243943	6.20923e-10
		Pbr003161.1	Pb2:21926797	Pbr007491.1	Pb15:38413551	0.226603	4.29552	0.0527533	1.23152e-74
		Pbr003186.1	Pb15:41233260	Pbr040276.1	Pb6:16755400	0.175593	4.00291	0.0438663	1.22146e-120
		Pbr003572.1	scaffold1158.0:87852	Pbr013072.1	Pb3:22763879	0.450539	4.22545	0.106625	1.00305e-91
		Pbr007491.1	Pb15:38413551	Pbr010647.1	Pb15:12835425	0.234238	4.29804	0.0544986	5.37128e-71
		Pbr007816.1	Pb1:1823076	Pbr042907.1	Pb10:6223213	0.177575	4.23656	0.041915	3.90565e-107
		Pbr007881.1	Pb15:20374525	Pbr040276.1	Pb6:16755400	0.210423	4.05838	0.051849	1.16392e-86
		Pbr010647.1	Pb15:12835425	Pbr042907.1	Pb10:6223213	0.318497	4.32485	0.0736434	1.02356e-73
		Pbr011565.1	Pb11:25403416	Pbr014612.1	Pb12:4660283	0.204301	1.48729	0.137364	2.15562e-57
		Pbr011665.1	Pb6:18116682	Pbr018565.1	Pb13:7679860	0.0451387	0.157381	0.286813	2.75708e-08
		Pbr013072.1	Pb3:22763879	Pbr014612.1	Pb12:4660283	0.181755	1.34858	0.134775	1.2592e-57
		Pbr013115.1	Pb3:22431965	Pbr015975.1	scaffold235.0:579858	0.217983	4.0062	0.0544114	1.8213e-67
		Pbr014612.1	Pb12:4660283	Pbr016121.1	Pb10:3528603	0.229958	4.30025	0.0534754	7.39713e-83
		Pbr014616.1	Pb12:4644524	Pbr035731.1	Pb11:25962471	0.267087	3.96625	0.0673399	2.79035e-50
		Pbr014711.1	Pb13:5124405	Pbr042907.1	Pb10:6223213	0.48859	4.23017	0.115501	2.68125e-94
		Pbr015971.1	scaffold235.0:526618	Pbr016121.1	Pb10:3528603	0.214075	4.2973	0.0498162	1.67552e-96
		Pbr015975.1	scaffold235.0:579858	Pbr035731.1	Pb11:25962471	0.216549	3.77414	0.0573771	3.8088e-50
		Pbr016120.1	Pb10:3521729	Pbr000504.1	Pb5:24950106	0.330639	4.26941	0.0774435	2.86112e-109
		Pbr018565.1	Pb13:7679860	Pbr042907.1	Pb10:6223213	0.331575	4.23471	0.0782994	5.84803e-55
		Pbr019032.1	Pb8:14318720	Pbr022407.1	Pb17:3519218	0.191027	4.1985	0.0454988	7.23244e-112
		Pbr020002.1	Pb15:5458701	Pbr022407.1	Pb17:3519218	0.206327	4.21215	0.0489837	8.30894e-101
		Pbr022407.1	Pb17:3519218	Pbr000504.1	Pb5:24950106	0.351233	4.2458	0.0827249	5.85294e-102
		Pbr026536.1	Pb8:4160915	Pbr040276.1	Pb6:16755400	0.190144	4.03896	0.0470775	1.86518e-110
		Pbr034256.1	Pb15:11682776	Pbr000504.1	Pb5:24950106	0.278903	4.07438	0.0684528	2.05029e-97
		Pbr035731.1	Pb11:25962471	Pbr016120.1	Pb10:3521729	0.284945	3.9814	0.071569	3.73846e-89
		Pbr037774.1	Pb16:5555692	Pbr042907.1	Pb10:6223213	0.328873	4.27481	0.0769328	4.09762e-71
		Pbr038418.1	Pb17:19073990	Pbr041843.1	scaffold958.0.1:41763	0.482446	4.02917	0.119738	3.12825e-53
		Pbr040276.1	Pb6:16755400	Pbr040625.1	Pb15:36545789	0.223198	3.98985	0.0559415	1.29971e-69
		Pbr040625.1	Pb15:36545789	Pbr007881.1	Pb15:20374525	0.244728	4.06726	0.0601703	3.74272e-64
		Pbr041843.1	scaffold958.0.1:41763	Pbr042907.1	Pb10:6223213	0.178261	4.26544	0.041792	1.3137e-90
		Pbr041844.1	scaffold958.0.1:100239	Pbr042907.1	Pb10:6223213	0.178261	4.26544	0.041792	1.3137e-90
		Pbr042784.1	scaffold364.0:337527	Pbr007881.1	Pb15:20374525	0.0996413	1.93744	0.0514293	1.48439e-55
Prunus mume	WGD	Pm000271	Pm1:1668345	Pm003063	Pm1:22944928	0.230044	4.08129	0.0563656	2.00957e-61
		Pm000275	Pm1:1685427	Pm003066	Pm1:22959936	0.186539	1.26723	0.147202	1.08732e-54
		Pm002088	Pm1:16502491	Pm004465	Pm2:5189599	0.118786	4.01258	0.0296034	1.02372e-81
		Pm003066	Pm1:22959936	Pm019034	Pm5:21810044	0.173262	1.30343	0.132928	6.52486e-58
		Pm000275	Pm1:1685427	Pm019034	Pm5:21810044	0.197077	1.52575	0.129167	3.34348e-40
		Pm005699	Pm2:12440530	Pm027719	Pm8:16682415	0.300087	4.03299	0.0744081	2.39136e-81
	TD	Pm010242	Pm3:3387024	Pm010243	Pm3:3391913	0.314911	4.23326	0.0743897	2.10978e-121
		Pm027552	Pm8:15836105	Pm027553	Pm8:15845145	0.0933883	0.211708	0.441118	0.000917422
	PD	Pm003063	Pm1:22944928	Pm003066	Pm1:22959936	0.371447	4.14422	0.08963	1.61554e-103
	TRD	Pm001690	Pm1:12519273	Pm018300	Pm5:17447015	0.185704	4.07091	0.0456173	7.85788e-73
		Pm003761	Pm2:54485	Pm021475	Pm6:9030731	0.185108	4.04177	0.0457988	9.29416e-84
	DSD	Pm000271	Pm1:1668345	Pm010243	Pm3:3391913	0.31481	4.09418	0.0768922	2.2804e-97
		Pm000275	Pm1:1685427	Pm010242	Pm3:3387024	0.252271	4.2562	0.0592714	1.09024e-87
		Pm001690	Pm1:12519273	Pm010458	Pm3:4546820	0.176424	2.40413	0.0733835	7.5604e-65
		Pm002088	Pm1:16502491	Pm029730	scaffold327:180493	0.15885	2.49291	0.0637208	5.54485e-64
		Pm003063	Pm1:22944928	Pm010243	Pm3:3391913	0.315395	4.14262	0.0761343	5.54629e-98
		Pm003066	Pm1:22959936	Pm010242	Pm3:3387024	0.215502	4.28431	0.0503002	9.74202e-100
		Pm003761	Pm2:54485	Pm029730	scaffold327:180493	0.16908	4.02927	0.0419629	3.91823e-114
		Pm004339	Pm2:4163178	Pm018300	Pm5:17447015	0.302404	4.27557	0.0707284	3.14002e-66
		Pm004465	Pm2:5189599	Pm029730	scaffold327:180493	0.169352	4.04976	0.0418178	1.62533e-71
		Pm005699	Pm2:12440530	Pm003066	Pm1:22959936	0.321806	4.20547	0.0765209	4.95696e-101
		Pm008498	Pm2:33557690	Pm010458	Pm3:4546820	0.360594	4.2802	0.0842471	2.13775e-67
		Pm009181	Pm2:39253265	Pm000275	Pm1:1685427	0.408572	4.08279	0.100072	6.26413e-95
		Pm010242	Pm3:3387024	Pm019034	Pm5:21810044	0.260202	4.29604	0.0605678	8.32198e-75
		Pm010243	Pm3:3391913	Pm027719	Pm8:16682415	0.268432	4.15231	0.0646463	2.51869e-91
		Pm010458	Pm3:4546820	Pm018300	Pm5:17447015	0.190685	5.08728	0.0374827	3.97976e-80
		Pm015932	Pm4:22161602	Pm008498	Pm2:33557690	0.6072	4.24327	0.143097	1.45469e-44
		Pm018300	Pm5:17447015	Pm003066	Pm1:22959936	0.356102	4.26531	0.0834881	1.10531e-62
		Pm019034	Pm5:21810044	Pm027719	Pm8:16682415	0.309553	4.23053	0.0731713	2.24894e-92
		Pm021475	Pm6:9030731	Pm026453	Pm8:9942311	0.0878874	1.63771	0.0536648	4.25426e-77
		Pm026453	Pm8:9942311	Pm029730	scaffold327:180493	0.192453	4.04002	0.0476367	6.13158e-110
		Pm027552	Pm8:15836105	Pm010458	Pm3:4546820	0.301106	4.13215	0.0728691	2.51227e-57
Prunus persica	WGD	Prupe.1G392900.1	Pp01:34974804	Prupe.3G097900.1	Pp03:7505530	0.197623	4.23048	0.0467142	1.02988e-107
		Prupe.1G521600.1	Pp01:42774219	Prupe.6G192200.1	Pp06:19944930	0.118285	4.03072	0.0293459	3.84539e-84
		Prupe.2G261600.1	Pp02:27062704	Prupe.6G290400.1	Pp06:26800420	0.182971	1.30628	0.140071	7.2967e-56
		Prupe.2G261600.1	Pp02:27062704	Prupe.6G043700.1	Pp06:3184042	0.197588	1.55089	0.127403	8.93785e-43
		Prupe.6G043300.1	Pp06:3165705	Prupe.6G290700.1	Pp06:26826846	0.243524	4.10849	0.0592732	1.18862e-62
		Prupe.6G043700.1	Pp06:3184042	Prupe.6G290400.1	Pp06:26800420	0.185755	1.31067	0.141724	5.18454e-57
	PD	Prupe.4G062900.1	Pp04:3012359	Prupe.4G063100.1	Pp04:3017615	0.312286	4.23131	0.0738036	1.32007e-119
		Prupe.6G290400.1	Pp06:26800420	Prupe.6G290700.1	Pp06:26826846	0.389792	4.19932	0.0928224	3.79498e-96
	TRD	Prupe.1G573300.1	Pp01:46728240	Prupe.5G054500.1	Pp05:5830702	0.167162	4.03293	0.0414493	1.31741e-107
		Prupe.6G156900.1	Pp06:13963210	Prupe.2G195900.1	Pp02:23340326	0.178464	4.15583	0.042943	8.79882e-84
	DSD	Prupe.1G026400.1	Pp01:1839104	Prupe.6G043700.1	Pp06:3184042	0.464366	4.22436	0.109926	1.07765e-78
		Prupe.1G091700.1	Pp01:6909489	Prupe.6G156900.1	Pp06:13963210	0.382473	4.21948	0.0906446	6.0323e-73
		Prupe.1G105000.1	Pp01:8458780	Prupe.4G085000.1	Pp04:4165712	0.338798	4.26649	0.079409	1.38258e-75
		Prupe.1G392900.1	Pp01:34974804	Prupe.7G261300.1	Pp07:21709633	0.294822	4.03192	0.073122	1.07643e-83
		Prupe.1G521600.1	Pp01:42774219	Prupe.5G054500.1	Pp05:5830702	0.164215	4.06634	0.0403841	8.28312e-75
		Prupe.1G539600.1	Pp01:44093994	Prupe.7G244500.1	Pp07:20886039	0.203779	2.5243	0.080727	1.66048e-70
		Prupe.1G573300.1	Pp01:46728240	Prupe.8G115900.1	Pp08:14305180	0.185051	4.04163	0.0457862	1.43211e-81
		Prupe.2G195900.1	Pp02:23340326	Prupe.4G085000.1	Pp04:4165712	0.17112	4.26688	0.0401043	3.84735e-93
		Prupe.2G261600.1	Pp02:27062704	Prupe.4G062900.1	Pp04:3012359	0.256035	4.26124	0.0600846	3.16929e-86
		Prupe.3G097900.1	Pp03:7505530	Prupe.4G062900.1	Pp04:3012359	0.369041	4.27227	0.0863805	4.59208e-79
		Prupe.3G262900.1	Pp03:24806492	Prupe.6G156900.1	Pp06:13963210	0.538257	4.14528	0.129848	2.24153e-65
		Prupe.4G062900.1	Pp04:3012359	Prupe.6G290400.1	Pp06:26800420	0.202536	4.25757	0.0475707	2.18692e-110
		Prupe.4G063100.1	Pp04:3017615	Prupe.7G261300.1	Pp07:21709633	0.285423	4.15951	0.0686194	9.78727e-91
		Prupe.4G085000.1	Pp04:4165712	Prupe.6G156900.1	Pp06:13963210	0.186735	3.08314	0.0605665	3.48136e-82
		Prupe.5G054500.1	Pp05:5830702	Prupe.8G115900.1	Pp08:14305180	0.165638	4.06148	0.0407828	4.3609e-83
		Prupe.6G043300.1	Pp06:3165705	Prupe.4G063100.1	Pp04:3017615	0.336995	4.10414	0.082111	0
		Prupe.6G043700.1	Pp06:3184042	Prupe.7G261300.1	Pp07:21709633	0.309841	4.16375	0.0744138	9.80297e-98
		Prupe.6G156900.1	Pp06:13963210	Prupe.7G244500.1	Pp07:20886039	0.271943	4.28169	0.0635129	2.32961e-80
		Prupe.6G192200.1	Pp06:19944930	Prupe.8G115900.1	Pp08:14305180	0.164	4.10474	0.0399538	2.53412e-74
		Prupe.6G290400.1	Pp06:26800420	Prupe.7G261300.1	Pp07:21709633	0.263219	4.15907	0.0632879	0
		Prupe.6G290700.1	Pp06:26826846	Prupe.4G063100.1	Pp04:3017615	0.319578	4.17647	0.0765186	2.7956e-97
		Prupe.7G138200.1	Pp07:15464402	Prupe.8G115900.1	Pp08:14305180	0.0893662	1.58624	0.0563384	5.2147e-74

## Sheet: S_Table4 
RPKM data in different tissues
Gene Name	root	canes	young leaf	mature leaf	flower	green fruit	red fruit	riped fruit
RoSnRK1.1	21.765	25.6151	15.66	12.6545	16.4595	15.7409	8.62835	14.8102
RoSnRK1.2	22.642	1.26878	0.907481	0.851475	1.44537	3.23607	8.11064	1.75164
RoSnRK2.1	133.207	132.309	65.1116	29.9844	93.8434	107.102	100.946	126.607
RoSnRK2.2	182.864	72.6972	60.0382	16.0065	39.6459	23.7766	77.703	68.8049
RoSnRK2.3	12.2686	4.03619	3.09988	2.1307	5.1669	8.24822	13.34	10.2507
RoSnRK2.4	131.281	48.6771	37.4221	17.4603	61.8986	99.1424	149.429	141.045
RoSnRK2.5	124.922	115.457	223.798	66.5631	123.663	77.0124	9.70703	9.63135
RoSnRK3.1	102.639	81.5904	81.3691	53.0275	54.8324	55.0533	64.1294	54.4084
RoSnRK3.2	35.8745	29.6454	27.4257	17.1899	43.0636	23.1151	21.4038	15.7268
RoSnRK3.3	365.008	382.846	298.052	675.953	408.544	630.886	610.708	352.639
RoSnRK3.4	1e-06	0.0449576	0.161601	0.617342	0.0441234	0.0455409	1e-06	0.0551705
RoSnRK3.5	5.18525	12.7774	6.05654	0.801414	9.42379	7.55658	0.981778	0.371125
RoSnRK3.6	80.0253	25.0238	14.7087	12.1459	7.59865	24.599	101.938	85.8342
RoSnRK3.7	49.6233	11.8123	19.2912	63.1735	15.5939	12.0594	4.12123	3.38232
RoSnRK3.8	166.217	42.394	42.9794	62.0279	54.4409	117.82	38.5985	20.5678
RoSnRK3.9	72.7915	61.2106	41.4437	140.056	63.0206	34.5886	10.5071	7.93342
RoSnRK3.10	44.2251	9.95509	2.2629	1.38139	9.61403	16.8878	44.6929	36.7148
RoSnRK3.11	34.054	43.9362	29.3353	9.37817	43.4908	236.303	74.3209	94.8833
RoSnRK3.12	36.2178	62.8158	50.0638	7.84929	60.6834	46.9747	26.274	33.351
RoSnRK3.13	32.5903	52.8027	48.5462	9.97233	29.8669	28.024	6.97629	7.12523
RoSnRK3.14	122.339	111.322	166.18	22.5481	130.335	85.0896	94.7277	100.013
RoSnRK3.15	79.3062	24.4459	37.7948	8.58183	21.7747	28.878	30.8	50.1165
RoSnRK3.16	12.4946	40.5341	50.5114	13.2855	61.6819	72.0403	102.368	103.51

## Sheet: S_Table5
Primer sequences used for qRT-PCR test and vector construction.
Forward/Reverse	Sequences (5ʹ-3ʹ)
RoSnRK2.1-F	GCCCAGAGAGCTCACAGAAA
RoSnRK2.1-R	CTTCTCCTCCCCAGCCAAAG
RoSnRK2.2-F	CCCTGCTGCGAGAATTACCA
RoSnRK2.2-R	GCTCTTCGAAATGGTTGCCC
RoSnRK2.3-F	CAGATCCCGACGACCTTGAC
RoSnRK2.3-R	CCTGAACCAGAGAACCCTCC
RoSnRK2.4-F	GTTCTATGCTCACAGTTGGGC
RoSnRK2.4-R	TTGTCCCTCATAAGCCTCGC
RoSnRK2.5-F	ACTGTTGGAACGCCTGCATA
RoSnRK2.5-R	GGGTTGGCAACAAAAACACGA
Ru18S-F	ACGTCATCCTCCGGCAAAGC
Ru18S-R	ACGACGAAGCTCGCAAGTACAC
RoSnRK2.1-GFP-F	gagaacacgggggactctagaATGGAAAAGTATGAACTTGTCAA
RoSnRK2.1-GFP-R	gcccttgctcaccatggatccGACGACACGTACTTCCCCACTT
RoSnRK2.2-GFP-F	gagaacacgggggactctagaATGGATCGGGCGGCGGTGACAGT
RoSnRK2.2-GFP-R	gcccttgctcaccatggatccAAGAGCATAGACTATCTCCCCAC
RoSnRK2.3-GFP-F	gagaacacgggggactctagaATGTTTATAGATGAAAATGTACA
RoSnRK2.3-GFP-R	gcccttgctcaccatggatccAGTACCACCTGAACCAGAGAACCC
RoSnRK2.4-GFP-F	gagaacacgggggactctagaATGGATCGTTCTATGCTCACAGT
RoSnRK2.4-GFP-R	gcccttgctcaccatggatccAATTGCATACACTATCTCTCCAC
RoSnRK2.5-GFP-F	gagaacacgggggactctagaATGGAGGAGAGGTATGAGCCAA
RoSnRK2.5-GFP-R	gcccttgctcaccatggatccTATAACACTAATATCAACTTCTG
